# Supplementary material for: Bioinspired Polydopamine Coatings Facilitate Attachment of Antimicrobial Peptidomimetics with Broad-Spectrum Antibacterial Activity
Source: MDPI journal article supplement (doi:10.3390/ijms23062952), 2022-03-09

# Bioinspired Polydopamine Coatings Facilitate Attachment of Antimicrobial Peptidomimetics with Broad-Spectrum Anti-bacterial Activity

Katrina Browne <sup>1,2</sup>, Rajesh Kuppusamy <sup>1,3</sup>, Renxun Chen <sup>1</sup>, Mark D. P. Willcox <sup>3</sup>, William R. Walsh <sup>3</sup>, David StC. Black <sup>1,\*</sup> and Naresh Kumar <sup>1,\*</sup>

<sup>1</sup> School of Chemistry, University of New South Wales (UNSW) Sydney, Sydney 2052, Australia; k.browne@unsw.edu.au (K.B.); r.kuppusamy@unsw.edu.au (R.K.); r.chen@unsw.edu.au (R.C.)

<sup>2</sup> Surgical and Orthopaedic Research Laboratories (SORL), Prince of Wales Clinical School, Prince of Wales Hospital, University of New South Wales (UNSW), Randwick 2031, Australia; w.walsh@unsw.edu.au

<sup>3</sup> School of Optometry and Vision Science, University of New South Wales (UNSW) Sydney, Sydney 2052, Australia; m.willcox@unsw.edu.au

\* Correspondence: d.black@unsw.edu.au (D.S.B.); n.kumar@unsw.edu.au (N.K.); Tel.: +61-2-9385-4657 (D.S.B.); +61-2-9385-4698 (N.K.)

## Contents:

1. General scheme for the synthesis of RK758
2. Chemical structure of ciprofloxacin

1. The general scheme for synthesis of RK-758 and the procedures are outlined in the WO2018081869A1 and Australian Provisional Patent Application No. 2021902457.

Note: RK758 contains Br and is important to consider when interpreting XPS analysis of surfaces

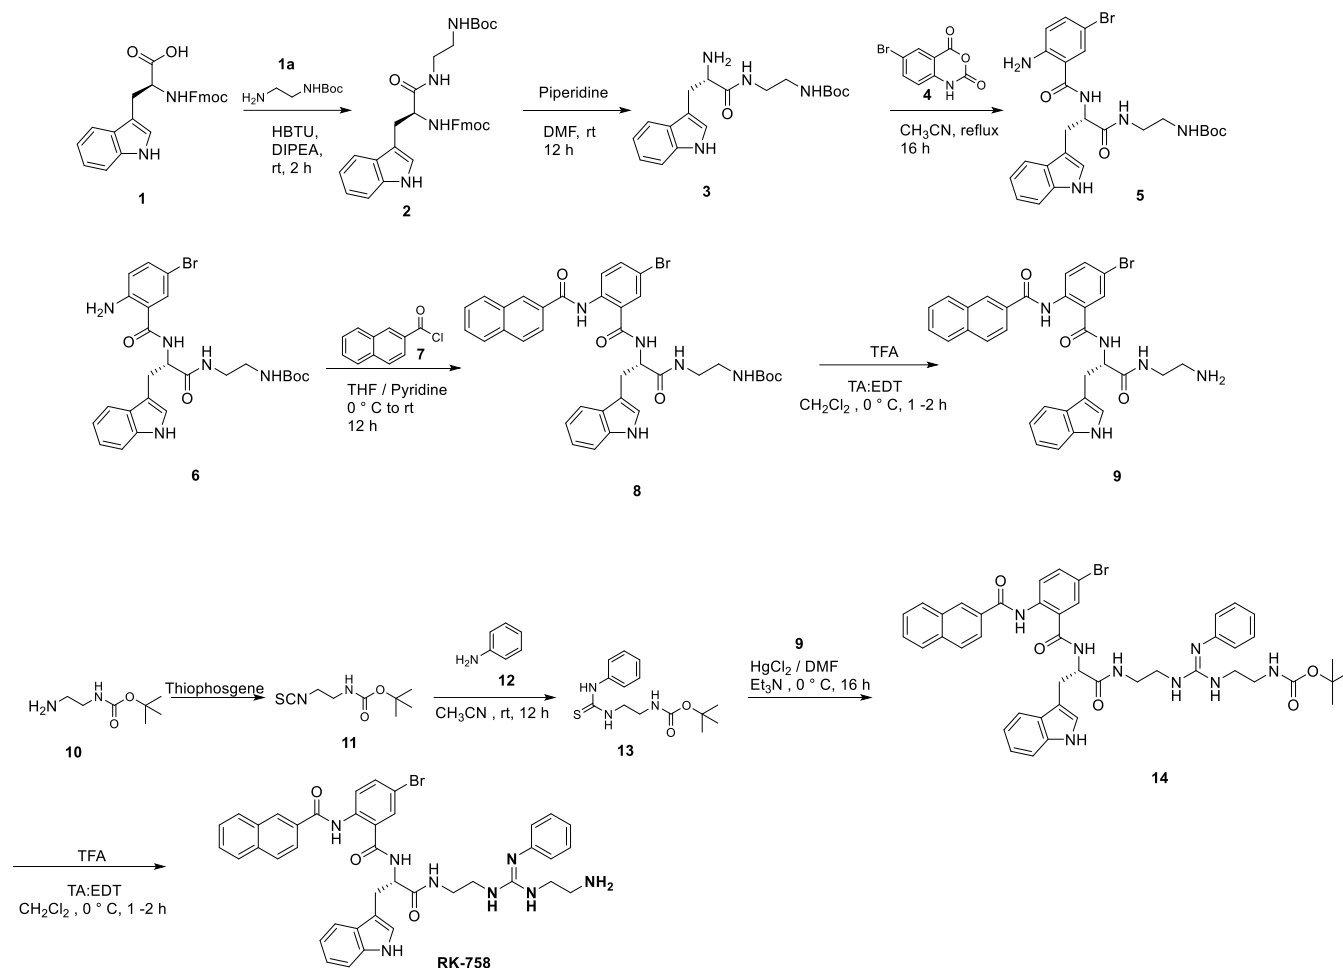

*Scheme S1: Synthetic route for RK-758*

## 2. Chemical structure of ciprofloxacin

Note: this compound contains F and is important to consider when interpreting XPS analysis of surfaces

Sigma Aldrich – CAS: 85721-33-1, Molecular weight: 331.34 g/mol

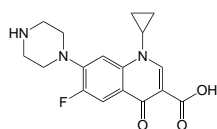

Supplement: s1 [file s1]
